# Supplementary material for: Homemade Pipette Tip Solid-Phase Extraction for the Simultaneous Determination of 40 Drugs of Abuse in Urine by Liquid Chromatography–Tandem Mass Spectrometry
Source: MDPI journal article supplement (doi:10.3390/separations9090233), 2022-09-01
Supplement: s1 [file s1]

**Table S1.** MRM parameters of the DOAs under study.

|    | Compound        | Rt<br>(min) | Precursor<br>ion | Product<br>ion 1 | CE 1<br>(eV) | Product<br>ion 2 | CE 2<br>(eV) | Product<br>ion 3 | CE 3<br>(eV) | Fragmentor<br>voltage (V) |
|----|-----------------|-------------|------------------|------------------|--------------|------------------|--------------|------------------|--------------|---------------------------|
| 1  | MOR             | 3.70        | 286.1            | 165              | 40           | 153              | 40           | 157              | 40           | 50                        |
| 2  | COD             | 6.28        | 300.2            | 165              | 40           | 199              | 36           | 153              | 42           | 100                       |
| 3  | Methylephedrine | 6.67        | 180.0            | 162              | 8            | 147              | 10           | 131              | 10           | 100                       |
| 4  | DMC             | 6.86        | 178.1            | 105              | 18           | 133              | 14           | 72               | 18           | 100                       |
| 5  | Methylone       | 7.26        | 208.0            | 160              | 16           | 132              | 20           | 190              | 10           | 100                       |
| 6  | Flephedrone     | 7.32        | 182.1            | 164              | 15           | 149              | 15           | 123              | 15           | 100                       |
| 7  | AMP             | 7.41        | 136.1            | 119              | 4            | 91               | 10           | -                | -            | 100                       |
| 8  | Ethcathinone    | 7.49        | 178.1            | 160              | 12           | 132              | 14           | 105              | 18           | 100                       |
| 9  | Hyoscine        | 7.86        | 304.0            | 156              | 20           | 138              | 20           | 121              | 20           | 100                       |
| 10 | 6-AM            | 8.49        | 328.2            | 211              | 36           | 193              | 36           | 165              | 40           | 100                       |
| 11 | MDA             | 8.51        | 180.1            | 163              | 6            | 135              | 10           | 133              | 10           | 100                       |
| 12 | Methedrone      | 8.98        | 194.1            | 176              | 10           | 161              | 16           | 145              | 16           | 100                       |
| 13 | MAMP            | 9.02        | 150.1            | 119              | 8            | 91               | 10           | -                | -            | 100                       |
| 14 | Ethylone        | 9.15        | 222.1            | 174              | 18           | 204              | 12           | 146              | 18           | 100                       |
| 15 | Buphedrone      | 9.39        | 178.1            | 91               | 15           | 131              | 15           | 132              | 15           | 100                       |
| 16 | MDMA            | 10.20       | 194.1            | 163              | 10           | 133              | 15           | 105              | 15           | 100                       |
| 17 | Oxo-LSD         | 10.70       | 356.0            | 237              | 20           | 222              | 20           | 265              | 12           | 100                       |
| 18 | 2-MMC           | 11.00       | 178.1            | 160              | 8            | 145              | 15           | 119              | 15           | 100                       |
| 19 | Butylone        | 11.15       | 222.1            | 174              | 14           | 204              | 10           | 191              | 10           | 100                       |
| 20 | Mephedrone      | 11.39       | 178.1            | 160              | 8            | 145              | 15           | 119              | 15           | 100                       |
| 21 | Norketamine     | 11.68       | 224.0            | 207              | 8            | 179              | 12           | 125              | 12           | 100                       |
| 22 | KET             | 12.42       | 238.0            | 125              | 20           | 220              | 12           | 207              | 12           | 125                       |
| 23 | BZE             | 12.76       | 290.1            | 168              | 20           | 105              | 20           | 82               | 20           | 125                       |
| 24 | 4-MEC           | 12.79       | 192.1            | 174              | 10           | 146              | 16           | 145              | 18           | 125                       |
| 25 | Pentedrone      | 13.33       | 192.1            | 174              | 10           | 132              | 16           | 91               | 18           | 125                       |
| 26 | 3,4-DMMC        | 14.36       | 192.1            | 174              | 10           | 159              | 15           | 133              | 15           | 125                       |
| 27 | HER             | 14.75       | 370.0            | 211              | 36           | 268              | 36           | 165              | 42           | 125                       |
| 28 | Alpha-PVP       | 15.10       | 232.2            | 91               | 22           | 105              | 25           | 126              | 25           | 125                       |
| 29 | COC             | 15.95       | 304.2            | 182              | 18           | 105              | 22           | 82               | 22           | 125                       |
| 30 | MDPV            | 15.70       | 276.2            | 126              | 25           | 135              | 25           | 175              | 20           | 125                       |
| 31 | LSD             | 16.34       | 324.2            | 231              | 24           | 208              | 26           | 180              | 26           | 125                       |
| 32 | Pyrovalerone    | 16.56       | 246.2            | 105              | 22           | 126              | 26           | 119              | 26           | 75                        |
| 33 | Fentanyl        | 17.44       | 337.2            | 188              | 22           | 105              | 24           | -                | -            | 100                       |
| 34 | Bromazepam      | 18.57       | 316.0            | 182              | 30           | 209              | 30           | 288              | 30           | 100                       |
| 35 | Buprenorphine   | 19.29       | 468.0            | 55               | 48           | 396              | 42           | 414              | 35           | 100                       |
| 36 | EDDP            | 20.18       | 278.0            | 234              | 30           | 249              | 20           | 186              | 30           | 100                       |
| 37 | Methadone       | 20.78       | 310.2            | 265              | 12           | 105              | 18           | -                | -            | 100                       |
| 38 | Lorazepam       | 21.15       | 321.0            | 275              | 20           | 303              | 10           | 230              | 20           | 100                       |
| 39 | Alprazolam      | 21.35       | 308.4            | 281              | 24           | 274              | 24           | 204              | 30           | 100                       |
| 40 | Diazepam        | 22.03       | 285.0            | 193              | 30           | 154              | 30           | 222              | 30           | 75                        |
